# Supplementary material
Source: PubMed Central journal article supplement (PMC5817273)
Supplement: mic-163-541-s001.pdf [file mic-163-541-s001.pdf]

# 1 Supporting information

2 **Table S1: List of oligonucleotides used in this study.**

| name                               | sequence (5' → 3')                                              |
|------------------------------------|-----------------------------------------------------------------|
| <i>PKS19</i> -KO-for               | GGCCCTCCTGCACAAACCTC                                            |
| <i>PKS19</i> -KO-rev               | GAAACTTGGCTACGGTAGGGAAGC                                        |
| <i>C19OXR1</i> -KO-for             | GATGTCCTCGGCCTCAGTCTC                                           |
| <i>C19OXR1</i> -KO-rev             | GCCTTTAGCTCAATGCGTCAG                                           |
| <i>C19TRF1</i> -KO-for             | GCGCGAAAAGAGCAGCAGTGG                                           |
| <i>C19TRF1</i> -KO-rev             | TCGCCGAGGCAGTCAAACAGAGT                                         |
| <i>C19TRF2</i> -1-KO-for           | GGCAGGCATCATTACCATT                                             |
| <i>C19TRF2</i> -1-KO-rev           | GACTGTAATATCAAGCGTGCGATAG                                       |
| <i>C19TRF2</i> -2-KO-for           | CACAACACAATGGCCTACCA                                            |
| <i>C19TRF2</i> -2-KO-rev           | GCATTCTGAATTACCCAAAGCA                                          |
| <i>PKS19</i> -comp1-for            | CGTACGATGTCCCAATCTTCCTTGGTG                                     |
| <i>PKS19</i> -comp1-rev            | GTGGTGGTGTGCGAGCTTGTGG                                          |
| <i>PKS19</i> -comp2-for            | CTGTTCCCTCCACGGACACCCCATC                                       |
| <i>PKS19</i> -comp2-rev            | CAGAAGGCTGCGATATATTTGTGGAATTCTAC                                |
| <i>EF1</i> -prom <i>PKS19</i> -for | CGTACGCTGAGAGCGAGAAAAAAAAAACTCTTC                               |
| <i>EF1</i> -prom <i>PKS19</i> -rev | CGTACGGGTTTGGTGCTCTCTTTTTGATG                                   |
| <i>C19OXR1</i> -comp-for           | CGGCGCAAGACTAGGAAGAGAAG                                         |
| <i>C19OXR1</i> -comp-rev           | CACCCGGTAAATAATATGCCTGTTGAC                                     |
| <i>EF1</i> -prom <i>OXR1</i> -for  | CTGAGAGCGAGAAAAAAAAAACTCTTC                                     |
| <i>EF1</i> -prom <i>OXR1</i> -rev  | CAAGCTTGGTTTGGTGCTCTCTTTTTGATG                                  |
| <i>EF1</i> - <i>C19OXR1</i> -for   | CAAGCTTATGACCATCAAGTTCGCCTCTC                                   |
| <i>EF1</i> - <i>C19OXR1</i> -rev   | GTCCACTGTCTCGTTACTCTAAAGC                                       |
| <i>TRF1</i> ex <i>HPT</i> -for     | ctaggccaccatgttggcccgccgcccGTCGACGTTAACTGATATTGAAGGAGCATTTTTTTG |
| <i>TRF1</i> ex <i>HPT</i> -rev     | tcgctctcagtcgacGTCGACGTTAACTGGTTCCCGGTCG                        |
| <i>TRF1</i> ex <i>EF1</i> -for     | ccagttaacgtcgacGTCGACTGAGAGCGAGAAAAAAAAAACTC                    |
| <i>TRF1</i> ex <i>EF1</i> -rev     | aatctcagtagccatGGTGGCGGTTTGGTGCTCTCTTTTT                        |
| <i>C19TRF1</i> ex-for              | caccaaacgccaccATGGCTACTGAGATTAATATGCCCAT                        |
| <i>C19TRF1</i> ex-rev              | gtcagatctaccatgttgactcctctaaCCAAGAGAATCAAGGAAATTCAAC            |
| <i>EF1</i> - <i>C19TRF2</i> ex-for | CTCTTCGTCGGATTATCATGC                                           |
| <i>EF1</i> - <i>C19TRF2</i> ex-rev | GCATATTAATCTCAGTAGCCATGGCTCTCTTTTTGATGATAATGT                   |
| <i>C19TRF2</i> ex-for              | ACATTATCATCAAAAAGAGAGCCATGGCTACTGAGATTAATATGC                   |
| <i>C19TRF2</i> ex-rev              | CATCCACACAGCGTCGTAAC                                            |
| <i>C19TRF2</i> ex-template-for     | CCTCCCCTCGTACCCCTTCAATC                                         |
| <i>C19TRF2</i> ex-template-rev     | CGAGCAACCCAGCGAGTCAGC                                           |
| RT-actin-for                       | CCCAGCGGACAGGTTATCAC                                            |
| RT-actin-rev                       | GAGAGCGAGGCGAGAATGG                                             |
| RT- <i>EF1</i> -for                | CAGGCGATGTGGGCAGTGTG                                            |
| RT- <i>EF1</i> -rev                | GATCCTCAAGCCCGGTATGGTC                                          |
| RT- <i>PKS19</i> -for              | CATTGGAATGGGCTGCCG                                              |
| RT- <i>PKS19</i> -rev              | AGTTGCCACGTAGCAGCC                                              |
| RT- <i>C19OXR1</i> -for            | CACGCTCGGCAAGCTAAAGA                                            |
| RT- <i>C19OXR1</i> -rev            | TCGAGGGCGTCGATCATCA                                             |
| RT- <i>C19OXR2</i> -for            | CTCTCAACACGTTTCACGGCA                                           |
| RT- <i>C19OXR2</i> -rev            | TCGCGTTGTACACGTTGAACTG                                          |
| RT- <i>C19RED1</i> -for            | GGCGGCCCTTCAACACTG                                              |

RT-*C19RED1*-rev  
RT-*C19RED2*-for  
RT-*C19RED2*-rev  
RT-*C19RED3*-for  
RT-*C19RED3*-rev  
DIG-*PKS19*-for  
DIG-*PKS19*-rev  
DIG-*C19OXR1*-for  
DIG-*C19OXR1*-rev  
DIG-*C19TRF1*-for  
DIG-*C19TRF1*-rev  
DIG-*C19TRF2*-for  
DIG-*C19TRF2*-rev

GCCTCTGCACCATAGCCACAA  
AGTTTCGAGGCCATGTTCCAAG  
GACGCTGTTGACACGGATGC  
TCGCCGTCATCTCGTCCAC  
TCAGCAGCTTGCTCAATCGTC  
CCCAGGCACGTGTGGGAATAC  
CACCATGAGGGCCTTTTCCAC  
GACCCCGGTAACGTGTTTCGC  
TCGCTGGCCCTTGACTGACTGT  
TCGATTTTCTTCGGGTGTT  
TTCTTGGGTTCTTGGGTGTC  
TAGGTGTCCCAAGTTCCTG  
GTCGGCTTCATCGACTCTTC

4 **Table S2: Putative PKS-encoding genes in the *MoWT* genome.** The MGG number of the PKS genes in the 8th  
5 annotation of the *M. oryzae* genome is listed. The conserved protein domains were identified using the  
6 Interpro database and the PFAM identities were listed. X = domain detected, (X) = insignificant PFAM hit,  
7 KS-N = N-terminal  $\beta$ -ketoacylsynthase, KS-C = C-terminal  $\beta$ -ketoacylsynthase, AT = acyltransferase,  
8 PP = phosphopanthetin-binding sequence, KR = ketoreductase, MT = methyltransferase,  
9 ADH/ADHZ = alcohol dehydrogenases, TE = thioesterase.

| MGG-nr    | gene-name                                                                                           | PKS-form                 | KS-N<br>(PF00109) | KS-C<br>(PF02801) | AT (PF00698) | PP (PF00550) | KR (PF08659) | MT (PF08242) | ADH/ADHZ<br>(PF08240/<br>PF00107) | TE (PF00975) |
|-----------|-----------------------------------------------------------------------------------------------------|--------------------------|-------------------|-------------------|--------------|--------------|--------------|--------------|-----------------------------------|--------------|
| MGG_00241 | <i>MoPKS1</i>                                                                                       | non-reducing             | X                 | X                 | X            | X            |              |              |                                   | X            |
| MGG_07219 | <i>MoPKS2</i><br>( <i>ALB1</i> ,<br><i>Howard</i><br><i>and</i><br><i>Valent</i> ,<br><i>1996</i> ) |                          | X                 | X                 | X            | X            |              |              |                                   | X            |
| MGG_12478 | <i>MoPKS3</i>                                                                                       |                          | X                 | X                 | X            | X            |              |              |                                   | X            |
| MGG_00428 | <i>MoPKS5</i>                                                                                       |                          | X                 | X                 | X            | X            |              |              |                                   | X            |
| MGG_10011 | <i>MoPKS20</i>                                                                                      |                          | X                 | X                 | X            | X            |              |              |                                   |              |
| MGG_13767 | <i>MoPKS7</i>                                                                                       | reducing-methylating     | X                 | X                 | X            | X            | X            | X            | X                                 |              |
| MGG_00806 | <i>MoPKS8</i>                                                                                       |                          | X                 | X                 | X            | X            | X            | X            | X                                 |              |
| MGG_08236 | <i>MoPKS9</i>                                                                                       |                          | X                 | X                 | X            | (X)          | X            | X            | X                                 |              |
| MGG_12214 | <i>MoPKS10</i>                                                                                      |                          | X                 | X                 | X            | (X)          | X            | X            | X                                 |              |
| MGG_14831 | <i>MoPKS21</i>                                                                                      |                          | X                 | X                 | X            | X            | X            | X            | X                                 |              |
| MGG_08281 | <i>MoPKS4</i>                                                                                       | Reducing non-methylating | X                 | X                 | X            | X            | X            |              | X                                 |              |
| MGG_00233 | <i>MoPKS12</i>                                                                                      |                          | X                 | X                 | X            | (X)          | X            |              | X                                 |              |
| MGG_04775 | <i>MoPKS13</i>                                                                                      |                          | X                 | X                 | X            | (X)          | X            |              | X                                 |              |
| MGG_05589 | <i>MoPKS14</i>                                                                                      |                          | X                 | X                 | X            | X            | X            |              | X                                 |              |
| MGG_14945 | <i>MoPKS15</i>                                                                                      |                          | X                 | X                 | X            | (X)          | X            |              | X                                 |              |
| MGG_13591 | <i>MoPKS16</i>                                                                                      |                          | X                 | X                 | X            | X            | X            |              | X                                 |              |
| MGG_12613 | <i>MoPKS17</i>                                                                                      |                          | X                 | X                 | X            | (X)          | X            |              | X                                 |              |
| MGG_18078 | <i>MoPKS18</i>                                                                                      |                          | X                 | X                 | X            | X            | X            |              |                                   |              |
| MGG_10912 | <i>MoPKS19</i>                                                                                      |                          | X                 | X                 | X            | (X)          | X            |              | X                                 |              |
| MGG_11638 | <i>MoPKS22</i>                                                                                      |                          | X                 | X                 | X            | (X)          | X            |              |                                   |              |

10

11 **Table S3:** Putative NRPS and PKS-NRPS encoding genes in the *MoWT* genome. The MGG number of the genes  
 12 in the 8th annotation of the *M. oryzae* genome is listed. The conserved protein domains were identified  
 13 using the Interpro database and the PFAM identities were listed. X = domain detected, (X) = insignificant  
 14 PFAM hit, KS-N = N-terminal  $\beta$ -ketoacylsynthase, KS-C = C-terminal  $\beta$ -ketoacylsynthase,  
 15 AT = acyltransferase, PP = phosphopantethin-binding sequence, AMP = AMP-binding sequence,  
 16 CD = condensation, KR = ketoreductase, MT = methyltransferase, ADH/ADHZ = alcohol  
 17 dehydrogenases, TE = thioesterase.

| MGG-nr    | gene-name                                          | PKS-form    | KS-N<br>(PF00109) | KS-C<br>(PF02801) | AT<br>(PF00698) | PP<br>(PF00550) | AMP<br>(PF00501) | CD<br>(PF00668) | KR<br>(PF08659) | MT<br>(PF08242) | ADH/ADHZ<br>(PF08240/<br>PF00107) | TE<br>(PF00975) |
|-----------|----------------------------------------------------|-------------|-------------------|-------------------|-----------------|-----------------|------------------|-----------------|-----------------|-----------------|-----------------------------------|-----------------|
| MGG_07803 | <i>MoPKSa</i><br>(TASI, Yun et al., 2015)          | partial PKS | X                 | X                 |                 | X               |                  |                 |                 | X               | X                                 |                 |
| MGG_10202 | <i>MoPKSb</i>                                      |             | X                 | X                 |                 |                 |                  |                 |                 |                 |                                   |                 |
| MGG_04118 | <i>MoPKSc</i>                                      |             |                   |                   | X               |                 |                  |                 |                 |                 |                                   |                 |
| MGG_14943 | <i>MoPKS-NRPS1</i>                                 | PKS-NRPS    | X                 | X                 | X               | X               | X                | X               | X               | X               |                                   |                 |
| MGG_03810 | <i>MoPKS-NRPS2</i>                                 |             | X                 | X                 | X               | X               | X                | X               | X               | X               |                                   |                 |
| MGG_09589 | <i>MoPKS-NRPS3</i>                                 |             | X                 | X                 | X               | X               | X                | X               | X               | X               |                                   |                 |
| MGG_12447 | <i>MoPKS-NRPS4</i><br>(ACEI, Böhnert et al., 2004) |             | X                 | X                 | X               | X               | X                | X               | X               | X               |                                   |                 |
| MGG_15097 | <i>MoPKS-NRPS5</i>                                 |             | X                 | X                 | X               | X               | X                | X               | X               | X               |                                   |                 |
| MGG_14897 | <i>MoPKS-NRPS6</i>                                 |             | X                 | X                 | X               | (X)             | X                | X               | X               | (X)             |                                   |                 |
| MGG_15100 | <i>MoPKS-NRPSa</i>                                 |             | X                 | X                 | X               | (X)             |                  | X               | X               | X               | X                                 |                 |
| MGG_15272 | <i>MoPKS-NRPSb</i>                                 | X           | X                 | X                 | X               |                 | X                | X               |                 | X               |                                   |                 |
| MGG_00022 | <i>MoNRPS1</i>                                     | NRPS        |                   |                   |                 | X               | X                | X               |                 |                 |                                   |                 |
| MGG_02351 | <i>MoNRPS2</i>                                     |             |                   |                   |                 | X               | X                | X               |                 |                 |                                   |                 |
| MGG_03401 | <i>MoNRPS3</i>                                     |             |                   |                   |                 | (X)             | X                | X               |                 |                 |                                   |                 |
| MGG_07858 | <i>MoNRPS4</i>                                     |             |                   |                   |                 | X               | X                | X               |                 |                 |                                   |                 |
| MGG_12175 | <i>MoNRPS5</i>                                     |             |                   |                   |                 | X               | X                | X               |                 |                 |                                   |                 |
| MGG_14767 | <i>MoNRPS6</i>                                     |             |                   |                   |                 | X               | X                | X               |                 |                 |                                   |                 |
| MGG_14967 | <i>MoNRPS7</i>                                     |             |                   |                   |                 | X               | X                | X               |                 |                 |                                   |                 |

18

19

20

21 **S1: Construction of gene inactivation, complementation and overexpression vectors**

22 In case of *AMopks19* a 4161 bp PCR product was amplified by using the primers *PKS19-KO-for* and *PKS19-KO-rev*  
 23 from genomic DNA of *M. oryzae* 70-15 and cloned into *pGEMTeasy* (Promega, Mannheim; Germany) giving the  
 24 vector *pGEMT+PKS19*. *pGEMT+PKS19* was restricted with *Bam*HI and a fragment of the coding sequence was  
 25 replaced by a *Bgl*III restricted *HPT* cassette from *pCAMB+HPT+Sal* (33) to give *pGEMT+PKS19+HPT*. The

26 *EcoRI* restricted fragment of *pGEMT+PKS19+HPT* was cloned into *EcoRI* restricted *pCAMBIA-0380* to give the  
27 gene inactivation vector *pCAMB+PKS19+HPT*.

28 For *ΔMopks19/PKS19* a 3246 bp PCR product was amplified by using the primers *PKS19-comp1-for* and *PKS19-*  
29 *comp1-rev* from genomic DNA of *M. oryzae* 70-15 and cloned into *pGEMTeasy* giving the vector  
30 *pGEMT+PKS19comp1*. The *EF1α* promoter (gene MGG\_03641) of *Magnaporthe oryzae* 70-15 was used to obtain  
31 a strong transcription of the *PKS19* since all experiments to complement the strain *ΔMopks19* with its native  
32 promoter region were not successful. Therefore, the *EF1α* promoter was amplified by using the primers *EF1-*  
33 *promPKS19-for* and *EF1-promPKS19-rev* from genomic DNA of *M. oryzae* 70-15 and cloned into *pGEMTeasy*  
34 giving the vector *pGEMT+EF1prom*. *pGEMT+PKS19comp1* was restricted with *BsiWI* and was ligated with the  
35 *BsiWI* restricted *EF1α*-fragment from *pGEMT+EF1prom* to give *pGEMT+EF1+PKS19a*. Furthermore, a 5352  
36 bp PCR product was amplified by using the primers *PKS19-comp2-for* and *PKS19-comp2-rev* from genomic DNA  
37 of *M. oryzae* 70-15 and cloned into *pGEMTeasy* giving the vector *pGEMT+PKS19comp2*. *pGEMT+PKS19comp2*  
38 was restricted with *PmlI/SpeI* and was ligated with the *PmlI/SpeI* restricted fragment of *pGEMT+EF1+PKS19a*  
39 to give *pGEMT+EF1+PKS19b*. *pGEMT+EF1+PKS19b* was restricted with *ApaI/EcoRI* and was ligated into the  
40 *ApaI/EcoRI* restricted vector *pCAMB+ILV* (33) to give the complementation vector  
41 *pCAMB+EF1+PKS19comp+ILV*.

42 In case of *ΔMoC19ox1* a 4287 bp PCR product was amplified by using the primers *C19OX1-KO-for* and *C19OX1-*  
43 *KO-rev* from genomic DNA of *M. oryzae* 70-15 and cloned into *pGEMTeasy* giving the vector *pGEMT+C19OX1*.  
44 *pGEMT+ C19OX1* was restricted with *BglII/MfeI* and a fragment of the coding sequence was replaced by a  
45 *BglII/EcoRI* restricted *HPT* cassette from *pCAMB+HPT+Sal* to give *pGEMT+C19OX1+HPT*. The *NotI* restricted  
46 fragment of *pGEMT+C19OX1+HPT* was cloned into *PspOMI* restricted *pCAMBIA-0380* to give the gene  
47 inactivation vector *pCAMB+C19OX1+HPT*.

48 For *ΔMoC19ox1/OX1* a 3796 bp PCR product was amplified by using the primers *C19OX1-comp-for* and  
49 *C19OX1-comp-rev* from genomic DNA of *M. oryzae* 70-15 and cloned into *pGEMTeasy* giving the vector  
50 *pGEMT+C19OX1comp*. The *NotI* restricted fragment of *pGEMT+C19OX1comp* was cloned into *PspOMI*  
51 restricted *pCAMB+ILV* to give the complementation vector *pCAMB+C19OX1comp+ILV*.

52 For *MoEF1::C19OX1* a 2116 bp PCR product was amplified by using the primers *EF1-C19OX1-for* and *EF1-*  
53 *C19OX1-for* from genomic DNA of *M. oryzae* 70-15 and cloned into *pGEMTeasy* giving the vector  
54 *pGEMT+C19OX1*. A second PCR product was amplified by using the primers *EF1-promOX1-for* and *EF1-*

55 *promOX1*-for from genomic DNA of *M. oryzae* 70-15 and cloned into *pGEMTeasy* giving the vector  
56 *pGEMT+EF1+promOX1*. *pGEMT+C19OX1* was restricted with *ApaI/HindIII* and a *ApaI/HindIII* restricted  
57 fragment of *pGEMT+EF1+promOX1* was ligated giving *pGEMT+EF1+C19OX1*. The *EcoRI* restricted fragment  
58 of *pGEMT+EF1+C19OX1* was cloned into the *EcoRI* restricted *pCAMB+HPT+Sal* to give the expression vector  
59 *pCAMB+EF1+C19OX1+HPT*.

60 For  $\Delta MoC19tf1$  a 3216 bp PCR product was amplified by using the primers *C19TF1-KO-for* and *C19TF1-KO-*  
61 *rev* from genomic DNA of *M. oryzae* 70-15 and cloned into *pGEMTeasy* giving the vector *pGEMT+C19TF1*.  
62 *pGEMT+ C19TF1* was restricted with *BamHI/XhoI* and a fragment of the coding sequence was replaced by a  
63 *BamHI/XhoI* restricted *HPT* cassette from *pCAMB+HPT+Hind* (33) to give *pGEMT+C19TF1+HPT*. The  
64 *ApaI/SpeI* restricted fragment of *pGEMT+C19TF1+HPT* was cloned into *ApaI/SpeI* restricted *pCAMBIA-0380* to  
65 give the gene inactivation vector *pCAMB+C19TF1+HPT*.

66 *MoEF1::C19TF1* was generated using the cloning strategy of Gibson-assembly (Gibson et al., 2009). The required  
67 fragments were amplified with the primers *TF1exEF1-for* and *TF1exEF1-rev* (*EF1 $\alpha$*  promoter fragment),  
68 *C19TF1ex-for* and *C19TF1ex-rev* (coding sequence of *MoC19TF1*+500 bp of terminator region) from genomic  
69 DNA of *M. oryzae* 70-15. The *HPT* cassette was amplified with the primers *TF1exHPT-for* and *TF1exHPT-rev*  
70 from pCB1003 (Sweigard, Chumley, Carroll, Farrall, & Valent, 1997) and the backbone vector was an  
71 *EcoRI/HindIII* restricted *pCAMBIA-0380* to give the gene expression vector *pCAMB+EF1::C19TF1+HPT*.

72 In case of  $\Delta MoC19tf2$  a 976 bp PCR product was amplified by using the primers *C19TF2-1-KO-for* and *C19TF2-*  
73 *1-KO-rev* from genomic DNA of *M. oryzae* 70-15 and cloned into *pJET1.2 blunt* (Fermentas GmbH, St. Leon-  
74 Roth, Germany) giving the vector *pJET+C19TF2-1*. A second 942 bp PCR product was amplified by using the  
75 primers *C19TF2-2-KO-for* and *C19TF2-2-KO-rev* from genomic DNA of *M. oryzae* 70-15 and cloned into  
76 *pJET1.2 blunt* giving the vector *pJET+C19TF2-2*. *pJET+C19TF2-1* was restricted with *BglIII* and cloned into the  
77 *BamHI* restricted *pCAMB+HPT+Sal* to give *pCAMB+C19TF2-1+HPT*. *pJET+C19TF2-2* was restricted with  
78 *BglIII* and cloned into the *BglIII* restricted *pCAMB+C19TF2a+HPT* to give the gene inactivation vector  
79 *pCAMB+C19TF2+HPT*.

80 For *MoEF1::C19TF2* a 1137 bp PCR product was amplified by using the primers *EF1-C19TF2ex-for* and *EF1-*  
81 *C19TF2ex-rev* from genomic DNA of *M. oryzae* 70-15. This product was used as a megaprimer for RF-cloning  
82 (Bryksin & Matsumura, 2010) (Unger, Jacobovitch, Dantes, Bernheim, & Peleg, 2010). A second 2978 bp PCR  
83 product was amplified by using the primers *C19TF2ex-for* and *C19TF2ex-rev* from genomic DNA of *M. oryzae*

84 70-15. This product was used as a second megaprimer for RF-cloning. The template for RF cloning was the vector  
85 *pGEMT+C19TF2(temp)*. *pGEMT+C19TF2(temp)* was given by ligation of the PCR amplificate of the primers  
86 *C19TF2ex-template-for* and *C19TF2ex-template-rev* into *pGEMTeasy*. The RF amplificate was cloned into  
87 *pJET1.2 blunt* giving *pJET+EF1::C19TF2*. The *Bgl*III restricted fragment of *pJET+EF1::C19TF2* was cloned into  
88 *Bgl*III restricted *pCAMB+HPT+Sal* to give the gene expression vector *pCAMB+EF1::C19TF2+HPT*.

89

90 S2: NMR-data

91 1/ PR-70-15-3 was identified as pyriculol based on the comparison with data from the literature (Iwasaki et al.,  
92 1973).

93 <sup>1</sup>H NMR (500 MHz, CDCl<sub>3</sub>) of pyriculol

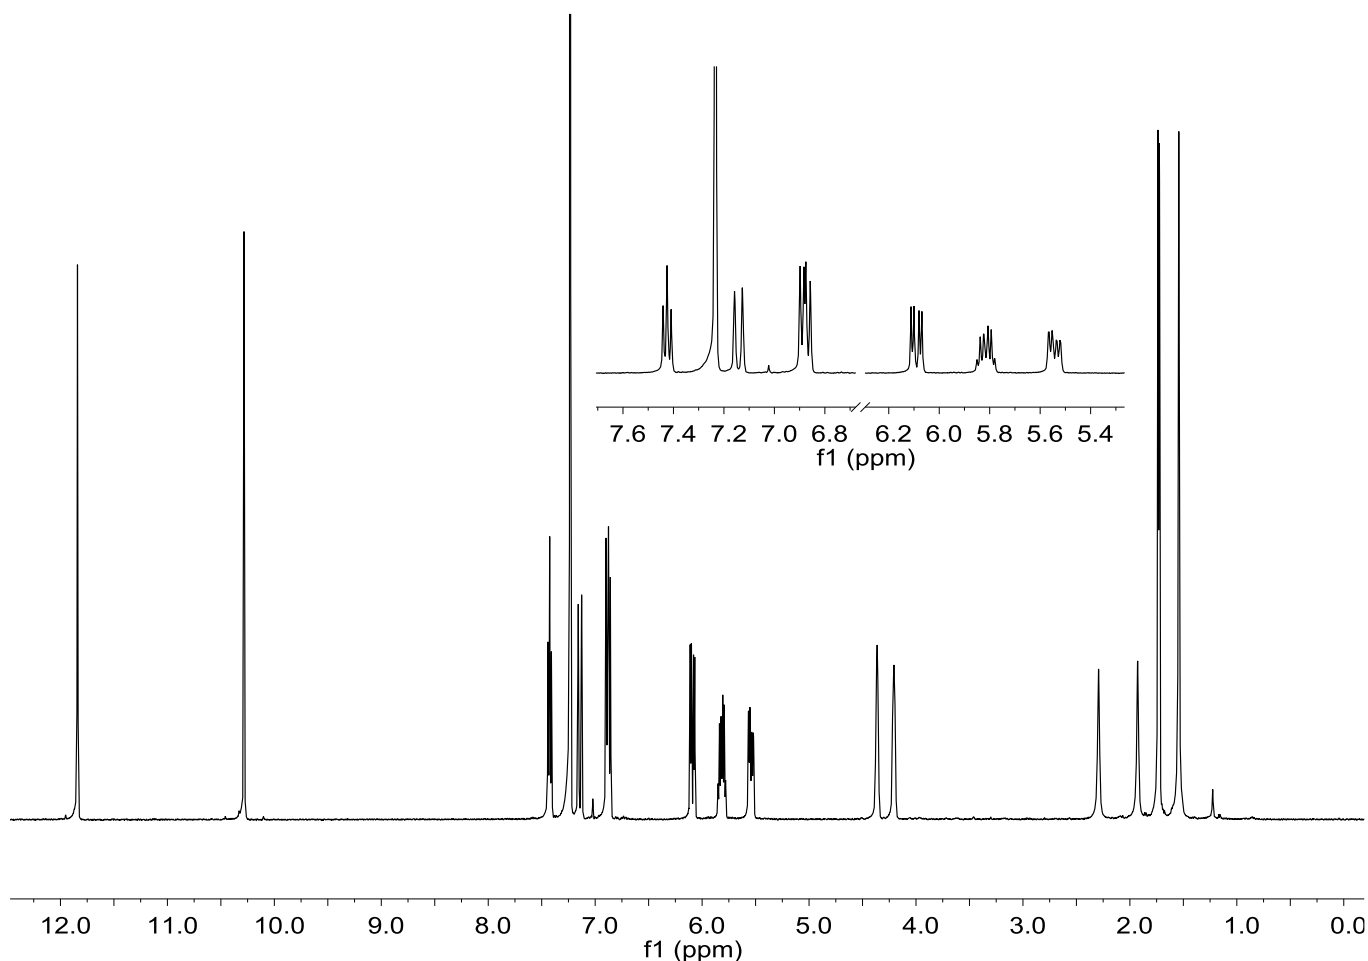

94

95  $\delta = 11.84$  (s, 1H, 3-OH), 10.28 (s, 1H, H-1), 7.43 (pseudo-t,  $J = 8.0$  Hz, 1H, H-5), 7.14 (dd,  $J = 15.7, 1.6$  Hz, 1H,  
96 H-8), 6.89 (d,  $J = 7.8$  Hz, 2H, H-6)\*, 6.87 (d,  $J = 8.6$  Hz, 2H, H-4)\*, 6.09 (dd,  $J = 15.7, 5.7$  Hz, 1H, H-9), 5.81  
97 (dq,  $J = 15.7, 6.4, 0.7$  Hz, 1H, H-13), 5.54 (ddq,  $J = 15.7, 7.3, 1.7$  Hz, 1H, H-12), 4.36 (br s, 1H, H-10), 4.21 (br

98 s, 1H, H-11), 2.30 (br s, 1H, OH), 1.30 (br s, 1H, OH), 1.73 (dd,  $J = 6.4, 1.7$  Hz, 3H, H-14) ppm. (\* = Assignment  
 99 maybe interchanged.)

100

101 2/ AV600-1602A7 was identified as pyriculariol based on the comparison with data from the literature ref  
 102 Tetrahedron Letters 50 (2009) 4637–4638. The H NMR shows that the sample contains 25% of a related  
 103 compound.

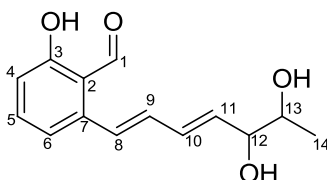

104

| position | AV600-1602A7 (CDCl <sub>3</sub> ) |       | pyriculariol (CDCl <sub>3</sub> ) |   |
|----------|-----------------------------------|-------|-----------------------------------|---|
|          | H                                 | C     | H                                 | C |
| 1        | 10.3 (1H, s)                      | 195.2 | 10.3 (1H, s)                      |   |
| 2        | -                                 | 117.5 | -                                 |   |
| 3        | -                                 | 163.0 | -                                 |   |
| 4        | 6.88 (1H, d, 8.3)                 | 117.3 | 6.87 (1H, d, 8.3)                 |   |
| 5        | 7.45 (1H, pseudo-t, 8.3)          | 137.3 | 7.45                              |   |
| 6        | 6.99 (1H, d, 8.3)                 | 118.5 | 6.98 (1H, d, 7.8)                 |   |
| 7        | -                                 | 142.5 |                                   |   |
| 8        | 7.08 (1H, d, 15.3)                | 127.0 | 7.06 (1H, d, 15.3)                |   |
| 9        | 6.68 (1H, dd, 10.7, 15.3)         | 135.0 | 6.66 (1H, dd, 10.3, 15.3)         |   |
| 10       | 6.53 (1H, dd, 10.7, 15.4)         | 132.3 | 6.53 (1H, dd, 10.7, 15.1)         |   |
| 11       | 5.95 (1H, dd, 6.8, 15.5)          | 134.1 | 5.96 (1H, dd, 6.3, 15.1)          |   |
| 12       | 4.23 (1H, m)                      | 75.9  | 4.23 (m)                          |   |
| 13       | 3.95 (1H, m)                      | 70.4  | 3.95 (m)                          |   |
| 14       | 1.19 (3H, d, 6.5)                 | 17.9  | 1.19 (3H, d, 6.3)                 |   |
| OH-2     | 11.9 (1H, s)                      | -     | 11.9 (1H, s)                      | - |
| OH-12    | 2.07 (1H, br s)                   | -     | 3.49                              |   |
| OH-13    | 1.93 (1H, br s)                   | -     | 2.31                              |   |

105

106 AV600-1602A7: <sup>1</sup>H NMR (CDCl<sub>3</sub>, 600 MHz): $\delta$  (ppm) 10.3 (1H, s, H-1), 6.88 (1H, d, 8.3, H-4), 7.45 (1H,  
 107 pseudo-t, 8.3, H-5), 6.99 (1H, d, 8.3 H-6), 7.08 (1H, d, 15.3, H-8), 6.68 (1H, dd, 10.7, 15.3, H-9), 6.53 (1H, dd,  
 108 10.7, 15.4, H-10), 5.95 (1H, dd, 6.8, 15.5, H-11), 4.23 (1H, m, H-12), 3.95 (1H, m, H-13), 1.19 (3H, d, 6.5, H-  
 109 14), 11.9 (1H, s, OH-2), 2.07 (1H, br s, OH-3), 1.93 (1H, br s, OH-13) <sup>13</sup>C NMR (CDCl<sub>3</sub>, 150 MHz): $\delta$  (ppm)  
 110 195.2 (C-1), 117.5 (C-2), 163.0 (C-3), 117.3 (C-4), 137.3 (C-5), 118.5 (C-6), 142.5 (C-7), 127.0 (C-8), 135.0 (C-  
 111 9), 132.3 (C-10), 134.1 (C-11), 75.9 (C-12), 70.4 (C-13), 17.9 (C-14).

112

113  $[\alpha]_D^{22} = +1.8$  (c = 0.11, CHCl<sub>3</sub>).

114

115

116 3/ AV600-1602A8 was identified as epidihydropyriculariol or dihydropyriculariol based on the comparison with data  
 117 from the literature Ref: Agricultural and Biological Chemistry Vol. 55 (1991) No. 11 P 2785-2791.

118

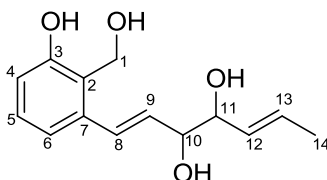

119



| position | AV600-1602A8 (MeOD)                      |       | Related to dihydropyriculariol (CDCl <sub>3</sub> +CD <sub>3</sub> OD) |   |
|----------|------------------------------------------|-------|------------------------------------------------------------------------|---|
|          | H                                        | C     | See ref                                                                | C |
| 1        | 4.78 (1H, d, 14.0)<br>4.76 (1H, d, 14.0) | 56.6  |                                                                        |   |
| 2        | -                                        | 125.3 |                                                                        |   |
| 3        | -                                        | 157.3 |                                                                        |   |
| 4        | 6.71 (1H, dd, 1.0, 8.0)                  | 115.4 |                                                                        |   |
| 5        | 7.07 (1H, pseudo-t, 7.9)                 | 129.7 |                                                                        |   |
| 6        | 6.99 (1H, d, 8.3)                        | 118.7 |                                                                        |   |
| 7        | -                                        | 139.7 |                                                                        |   |
| 8        | 6.95 (1H, d, 15.9)                       | 130.5 |                                                                        |   |
| 9        | 6.15 (1H, dd, 6.8, 15.9)                 | 132.6 |                                                                        |   |
| 10       | 4.15 (1H, ddd, 1.3, 5.0, 6.5)            | 77.0  |                                                                        |   |
| 11       | 4.04 (1H, dd, 5, 6.1)                    | 77.1  |                                                                        |   |
| 12       | 5.59 (1H, m)                             | 131.8 |                                                                        |   |
| 13       | 5.75 (1H, m)                             | 129.2 |                                                                        |   |
| 14       | 1.73 (3H, dd, 0.8, 6.5)                  | 18.1  |                                                                        |   |

120

121 AV600-1602A8: <sup>1</sup>H NMR (CD<sub>3</sub>OD, 600 MHz):δ (ppm) 4.78 (1H, d, 14.0, H-1a), 4.76 (1H, d, 14.0, H-1b), 6.71  
 122 (1H, dd, 1.0, 8.0, H-4), 7.07 (1H, pseudo-t, 7.9, H-5), 6.99 (1H, d, 8.3, H-6), 6.95 (1H, d, 15.9, H-8), 6.15 (1H, dd,  
 123 6.8, 15.9, H-9), 4.15 (1H, ddd, 1.3, 5.0, 6.5, H-10), 4.04 (1H, dd, 5, 6.1, H-11), 5.59 (1H, m, H-12), 5.75 (1H, m,  
 124 H-13), 1.73 (3H, dd, 0.8, 6.5, H-14) <sup>13</sup>C NMR (CD<sub>3</sub>OD, 150 MHz):δ (ppm) 56.6 (C-1), 125.3 (C-2), 157.3 (C-3),  
 125 115.4 (C-4), 129.7 (C-5), 118.7 (C-6), 139.7 (C-7), 130.5 (C-8), 132.6 (C-9), 77.0 (C-10), 77.1 (C-11), 131.8 (C-  
 126 12), 129.2 (C-13), 18.1 (C-14).

127

128  $[\alpha]_D^{22} = +5.7$  (c = 0.11, MeOH).

129

130

131 4/ AV600-1602A9 was identified as dihydropyriculariol based on the comparison with data from the literature

132 Ref: European Journal of Organic Chemistry Volume 2011, Issue 31, pages 6276–6280.

133

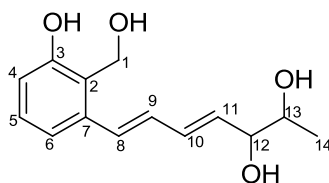

134

| position | AV600-1602A9 (MeOD)           |       |  | C |
|----------|-------------------------------|-------|--|---|
|          | H                             | C     |  |   |
| 1        | 4.77 (2H, s)                  | 56.3  |  |   |
| 2        | -                             | 125.3 |  |   |
| 3        | -                             | 157.4 |  |   |
| 4        | 6.70 (1H, d, 7.0)             | 115.4 |  |   |
| 5        | 7.08 (1H, pseudo-t, 8.0)      | 129.7 |  |   |
| 6        | 6.99 (1H, d, 7.0)             | 118.0 |  |   |
| 7        | -                             | 139.6 |  |   |
| 8        | 6.97 (1H, d, 15.2)            | 131.0 |  |   |
| 9        | 6.76 (1H, dd, 10.6, 15.2)     | 131.8 |  |   |
| 10       | 6.49 (1H, dd, 10.6, 15.3)     | 133.7 |  |   |
| 11       | 5.90 (1H, dd, 7.0, 15.3)      | 134.5 |  |   |
| 12       | 4.00 (1H, ddd, 1.0, 5.0, 6.2) | 77.6  |  |   |
| 13       | 3.71 (1H, m)                  | 71.7  |  |   |
| 14       | 1.19 (3H, d, 6.5)             | 18.7  |  |   |

135

136 AV600-1602A9 <sup>1</sup>H NMR (CD<sub>3</sub>OD, 600 MHz): δ (ppm) 4.77 (2H, s, H-1), 6.70 (1H, d, 7.0, H-4), 7.08 (1H, pseudo-  
137 t, 8.0, H-5), 6.99 (1H, d, 7.0, H-6), 6.97 (1H, d, 15.2, H-8), 6.76 (1H, dd, 10.6, 15.2, H-9), 6.49 (1H, dd, 10.6, 15.3,  
138 H-10), 5.90 (1H, dd, 7.0, 15.3, H-11), 4.00 (1H, ddd, 1.0, 5.0, 6.2, H-12), 3.71 (1H, m, H-13), 1.19 (3H, d, 6.5, H-  
139 14) <sup>13</sup>C NMR (CD<sub>3</sub>OD, 150 MHz): δ (ppm) 56.3 (C-1), 125.3 (C-2), 157.4 (C-3), 115.4 (C-4), 129.7 (C-5), 118.0  
140 (C-6), 139.6 (C-7), 131.0 (C-8), 131.8 (C-9), 133.7 (C-10), 134.5 (C-11), 77.6 (C-12), 71.7 (C-13), 18.7 (C-14).

141

142  $[\alpha]_D^{22} = +8.9$  (c = 0.07, MeOH).

143

144

145

146

147

148

149

150

151

152

153

154 Fig.S1: MoPKS19 expression in planta  
155

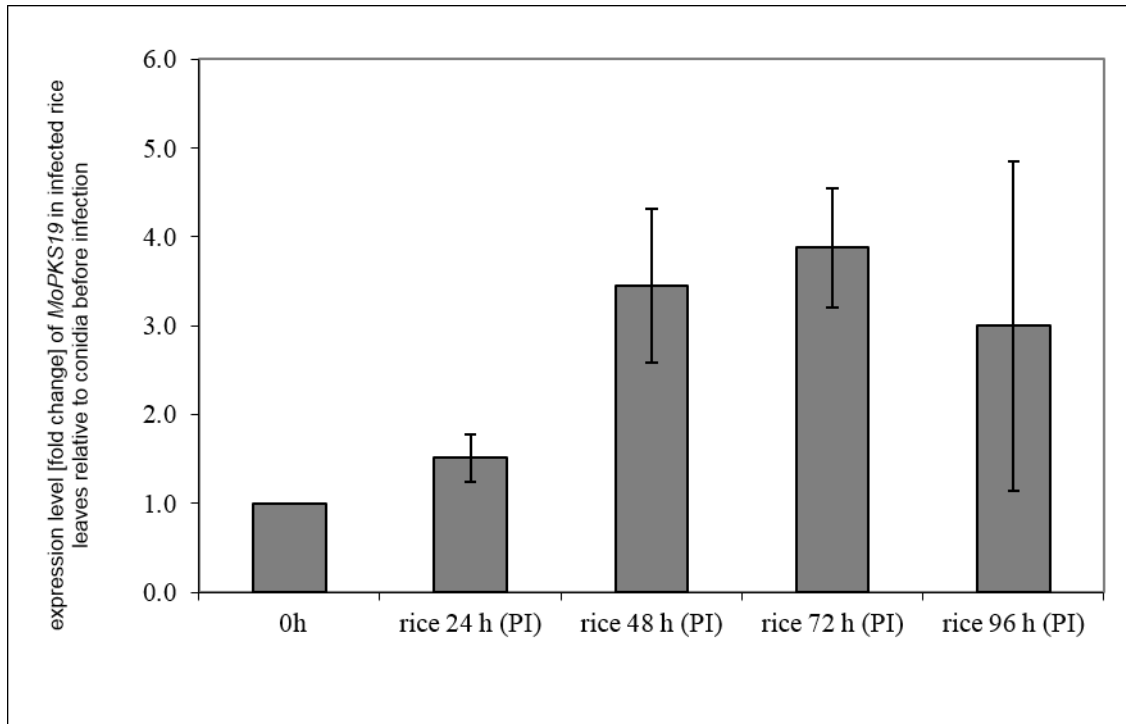

156

157 **Figure S1:** qRT-PCR analysis of the *in planta* expression level from the *MoPKS19* gene. Conidia of *M. oryzae*  
158 cultures were harvested and used for plant infection as stated in methods section. Samples were taken after  
159 24 h, 48 h, 72 h and 96 h. The RNA was isolated from rice leaves and the results of transcript abundance in  
160 were given relative to quantification in the conidia pre infection. Three replicates were made of each.

161

162 **Fig.S2: Phylogenetic analysis of MoPks19p and tree visualization**

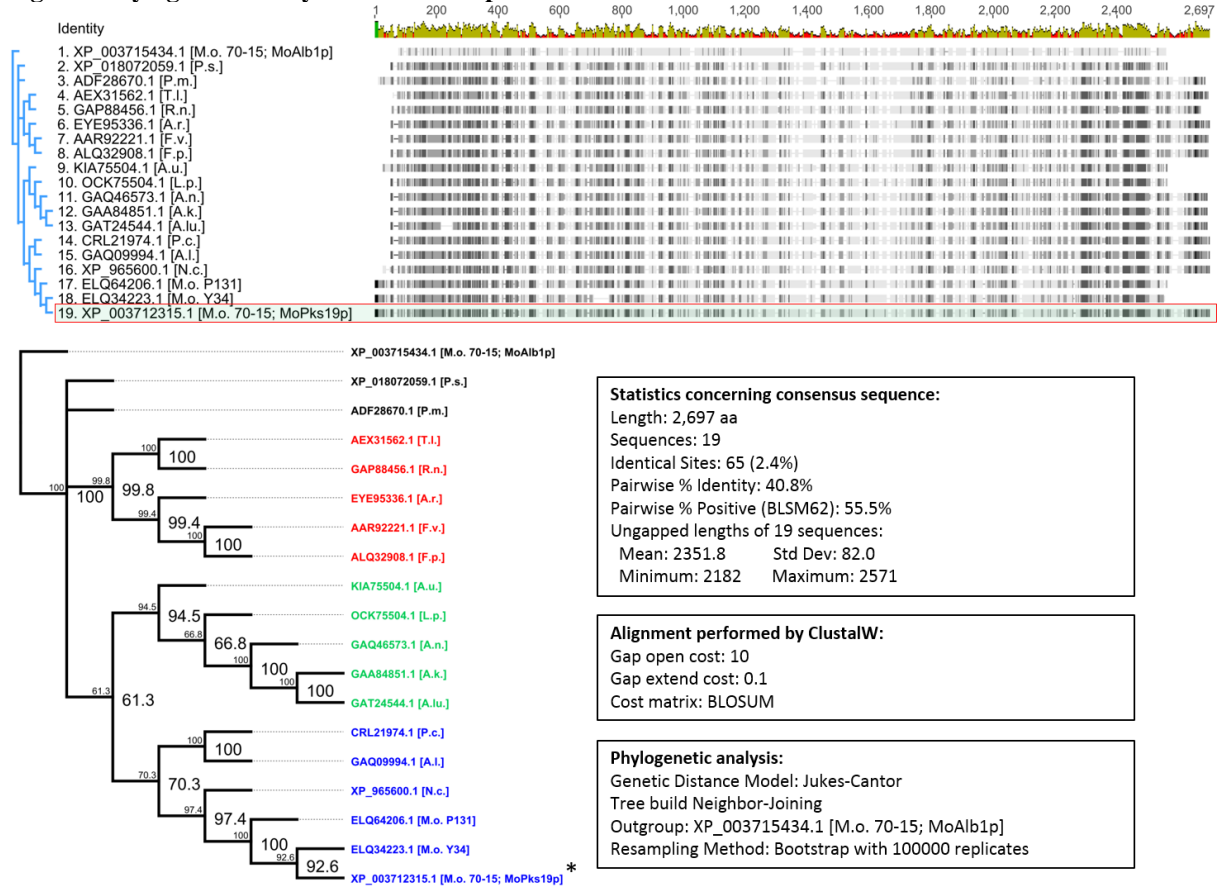

163  
 164 **Figure S2:** Phylogenetic analysis of amino acid sequences of MoPks19 from *Magnaporthe oryzae* and selected fungal  
 165 species. The GeneBank accession numbers of the analyzed proteins or the gene name from the JGI database  
 166 are shown and trivial names were shown in square brackets. Related clades of the dendrogram have the  
 167 same colour. MoAlb1p was used as *Magnaporthe*-internal PKS-control. P.s. (*Phialocephala scopiformis*),  
 168 N.c. (*Neurospora crassa*), R.n. (*Rosellinia necatrix*), A.n. (*Aspergillus niger*), P.m. (*Peltigera*  
 169 *membranacea*), F.v. (*Fusarium verticillioides*), A.l. (*Aspergillus lentulus*), M.o. (*Magnaporthe oryzae*),  
 170 A.k. (*Aspergillus kawachii*), A.lu. (*Aspergillus luchuensis*), A.r. (*Aspergillus ruber*), P.c. (*Penicillium*  
 171 *camemberti*), L.p. (*Lepidopterella palustris*), T.l. (*Trichoderma lixii*), L.p. (*Lepidopterella palustris*)

172

173 **Fig.S3: qPCR results from selected putative PKS19 clustered genes.**

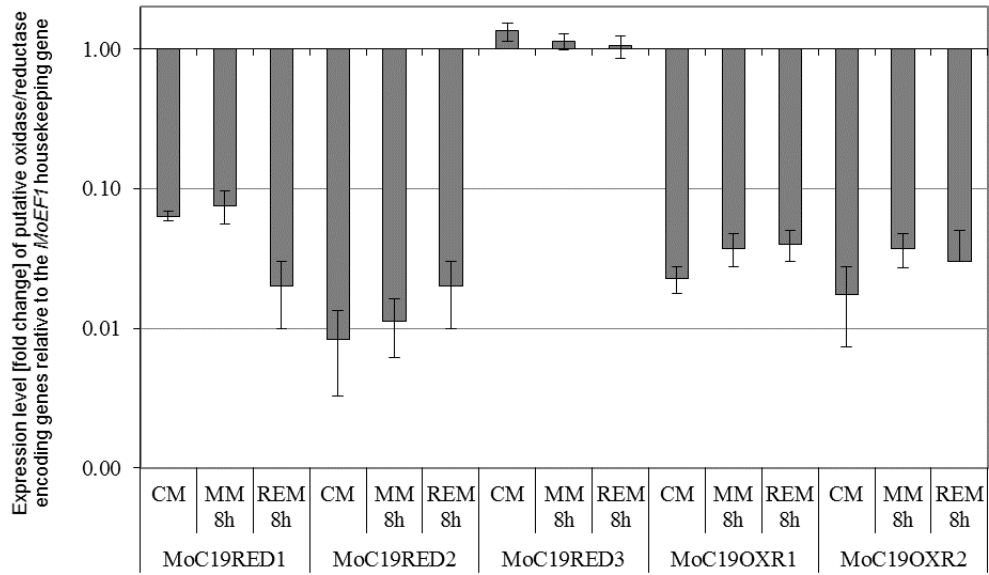

174

175 **Figure S3: qRT-PCR analysis of the expression level from selected putative PKS19 clustered genes.** The *M.*  
 176 *oryzae* cultures were grown for 72 h in CM at 26 °C and 120 rpm. The mycelium was transferred for further  
 177 submersed cultivation to MM or REM at 26 °C and 120 rpm. Samples were taken after 8 h. The RNA was  
 178 isolated from the mycelium samples and the results of transcript abundance in MM or REM were given  
 179 relative to EF1 alpha expression. Three replicates were made of each.

180 **Fig.S4: Pathogenicity assay**

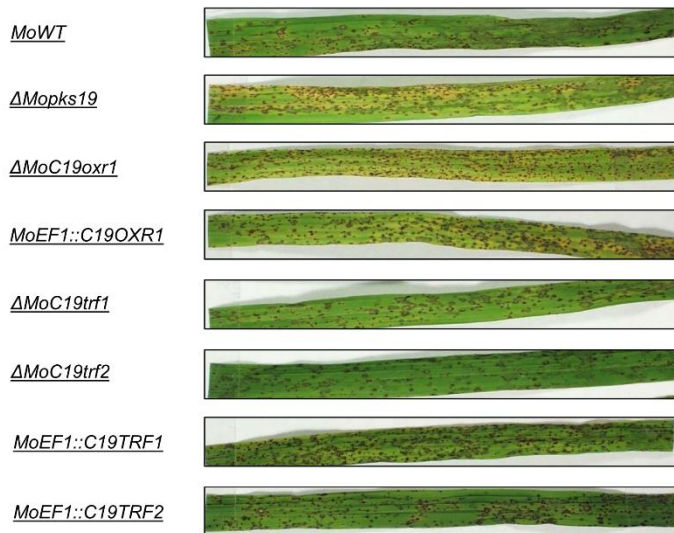

181

182 **Figure S4:** **Rice leaves of cultivar CO-39 infected with the *Magnaporthe oryzae* 70-15 (*MoWT*) strain and the**  
183 **mutant strains.** The plant infection assays were carried out as described in experimental procedures.  
184 Conidial suspensions were adjusted to  $5 \times 10^4$  conidia/mL in H<sub>2</sub>O containing 0.2% gelatin. The intact rice  
185 plants were spray-inoculated with each 5 mL of conidial suspension and were incubated in plastic bags in  
186 a test chamber for 5 days at 28°C.

187
